1 **The FluPRINT dataset, a multidimensional analysis of the influenza**  
2 **vaccine imprint on the immune system**

3 **Authors**

4 Adriana Tomic<sup>1,2\*</sup>, Ivan Tomic<sup>3</sup>, Cornelia L. Dekker<sup>4</sup>, Holden T. Maecker<sup>5</sup> and Mark M.  
5 Davis<sup>1,6,7</sup>

6 **Affiliations**

7 <sup>1</sup>Institute of Immunity, Transplantation and Infection, Stanford University School of  
8 Medicine, Stanford, CA 94304, USA.

9 <sup>2</sup>Oxford Vaccine Group, Department of Pediatrics, University of Oxford, Oxford OX3  
10 9DU, UK.

11 <sup>3</sup>Independent Researcher, Electronic address: [info@ivantomic.com](mailto:info@ivantomic.com).

12 <sup>4</sup>Department of Pediatrics, Stanford University School of Medicine, Stanford, CA  
13 94304, USA.

14 <sup>5</sup>Human Immune Monitoring Center, Stanford University, Stanford, CA 94304, USA.

15 <sup>6</sup>Department of Microbiology and Immunology, Stanford University School of  
16 Medicine, Stanford, CA 94304, USA.

17 <sup>7</sup>Howard Hughes Medical Institute, Stanford University, Stanford, CA 94304, USA.

18 \*Corresponding author: Adriana Tomic ([info@adrianatomic.com](mailto:info@adrianatomic.com))

19

## 20 **Abstract**

21 Recent advances in machine learning have allowed identification of molecular and  
22 cellular factors that underly successful antibody responses to influenza vaccines.  
23 Results of these studies have revealed the high level of complexity necessary to  
24 establish influenza immunity, and many different cellular and molecular components  
25 involved. However, identified correlates of protection, as measured by antibody  
26 responses fail to account for the majority of vaccinated cases across ages, cohorts,  
27 and influenza seasons. Major challenges arise from small sample sizes and from  
28 analysis of only one aspect of the biology such by using transcriptome data. The  
29 objective of the current study is to create a unified database, entitled FluPRINT, to  
30 enable a large-scale study exploring novel cellular and molecular underpinnings of  
31 successful antibody responses to influenza vaccines. Over 3,000 parameters were  
32 considered, including serological responses to influenza strains, serum cytokines, cell  
33 subset phenotypes, and cytokine stimulations. FluPRINT, thus facilitates application of  
34 machine learning algorithms for data mining. The data are publicly available and  
35 represent a resource to uncover new markers and mechanisms that are important for  
36 influenza vaccine immunogenicity.

## 37 **Background and Summary**

38 Influenza virus has a devastating societal impact, causing up to 650,000 deaths  
39 every year worldwide<sup>1</sup>. Vaccination can prevent influenza-like illnesses, and thus lower  
40 the risk of the virus outbreak. However, currently available vaccines do not always  
41 provide protection, even among otherwise-healthy people, leading to serious  
42 pandemics. The vaccine efficacy is measured as ability of a new seasonal influenza  
43 vaccine to prevent influenza-like illness compared to the placebo group, as defined by  
44 the US Food and Drug Administration (FDA) in their guideline for vaccine licensure<sup>2</sup>.  
45 Young children and elderly, due to high susceptibility to influenza infection<sup>3</sup>, are  
46 vaccinated annually and thus, placebo-controlled clinical efficacy study in this  
47 population cannot be performed. The alternative approach to correlate vaccine-  
48 mediated protection in these populations is based on immunogenicity endpoints,  
49 recommended by FDA. The appropriate immunogenicity endpoint is the influenza-  
50 specific antibody titer measured by a hemagglutination inhibition (HAI) assay to each  
51 viral strain included in the vaccine. Vaccine protection is then assessed based on  
52 seroconversion (4-fold increase in the HAI antibody titers after vaccination) and  
53 seroprotection (geometric mean HAI titer  $\geq 40$  after vaccination). The HAI titer  $\geq 40$  after  
54 vaccination is associated with a 50% reduction in risk of influenza infection or disease<sup>4</sup>.

55 Lack of pre-existing influenza immunity, especially T cells, has been identified  
56 as one of the major predispositions for failure to generate antibody response to  
57 vaccination<sup>5-7</sup>. However, exact phenotypes of CD4<sup>+</sup> and CD8<sup>+</sup> T cells, which are  
58 important for protective influenza immunity in general and to vaccination with live  
59 attenuated influenza vaccine (LAIV) in specific, remain elusive. Application of  
60 computational biology and machine learning to clinical datasets holds promise for  
61 identifying immune cell populations and genes that mediate HAI antibody responses to  
62 influenza vaccines as a correlate of vaccine protection<sup>8-15</sup>. Identified correlates of  
63 protection, moreover, are not consistent between cohorts and study years<sup>8,9,11,12</sup>. Some  
64 of the identified challenges leading to such discrepancy are small sample sizes and  
65 analysis of only one aspect of the biology, such as molecular correlates of protection  
66 by using transcriptome data<sup>16</sup>. Additionally, comparison of the results of different  
67 predictive models is hampered by the lack of a consensus regarding what defines the  
68 outcome of vaccination, i.e. high vs. low responders. For these reasons, it is necessary  
69 to generate a unified dataset that includes multiple measurements across age, gender  
70 and racially diverse populations, including different vaccine types. Specifically, it is of  
71 the utmost importance to include single-cell analysis at the protein level, such as mass  
72 cytometry combined with multiple high-dimensional biological measurements, since  
73 these have power to reveal heterogeneity of the immune system<sup>17-21</sup>.

74 To accomplish that goal, we generated FluPRINT, a dataset consisting of 13  
75 data types in standardized tables on blood and serum samples taken from 740  
76 individuals undergoing influenza vaccination with inactivated (IIV) or live attenuated  
77 seasonal influenza vaccines (LAIV) (**Fig. 1**). The FluPRINT dataset contains  
78 information on more than 3,000 parameters measured using mass cytometry (CyTOF),  
79 flow cytometry, phosphorylation-specific cytometry (phospho-flow), multiplex cytokine  
80 assays (multiplex ELISA), clinical lab tests (hormones and complete blood count),  
81 serological profiling (HAI assay) and virological tests. In the dataset, vaccine protection  
82 is measured using HAI assay, and following FDA guidelines individuals are marked as  
83 high or low responders depending on the HAI titers after vaccination. The FluPRINT  
84 represents fully integrated and normalized immunology measurements from eight  
85 clinical studies conducted between 2007 to 2015 at the Human Immune Monitoring  
86 Center (HIMC) of Stanford University. Among those, one contains data from 135  
87 donors enrolled in the 8-year long ongoing longitudinal study following immune  
88 responses to seasonal inactivated influenza vaccines. This is particularly interesting  
89 set of data that can deepen our understanding how repeated vaccination effects  
90 vaccine immunogenicity. The MySQL database containing this immense dataset is  
91 publicly available online ([www.fluprint.com](http://www.fluprint.com)). The dataset represents a unique source

92 in terms of value and scale, which will broaden our understanding of immunogenicity  
93 of the current influenza vaccines.

## 94 **Methods**

95 **Clinical studies.** All studies were approved by the Stanford Institutional Review  
96 Board and performed in accordance with guidelines on human cell research. Peripheral  
97 blood samples were obtained at the Clinical and Translational Research Unit at  
98 Stanford University after written informed consent/assent was obtained from  
99 participants. Samples were processed and cryopreserved by the Stanford HIMC  
100 BioBank according to the standard operating protocols available online at the HIMC  
101 website (<https://iti.stanford.edu/himc/protocols.html>).

102 **Data collection.** Data involving individuals enrolled in influenza vaccine studies  
103 at the Stanford-LPCH Vaccine Program was accessed from the Stanford Data Miner  
104 (SDM) which holds data processed by HIMC from 2007 up to date<sup>22</sup>. The FluPRINT  
105 cohort was assembled by filtering the SDM for assays available in studies involving  
106 influenza vaccination. This resulted in a dataset containing data from 740 healthy  
107 donors enrolled in influenza vaccine studies at the Stanford-LPCH Vaccine Program  
108 from 2007 to 2015 in the following studies: SLVP015, SLVP017, SLVP018, SLVP021,  
109 SLVP024, SLVP028, SLVP029 and SLVP030. **Table 1** provides a summary of all  
110 studies including information about clinical trial identification numbers on  
111 [www.clinicaltrials.gov](http://www.clinicaltrials.gov), clinical protocols, ImmPort accession numbers to access raw  
112 data and quality reports, and finally references to published works where data was  
113 used. ImmPort is a web portal that contains data from NIAID-funded immunology  
114 studies and clinical trials (<https://immport.niaid.nih.gov/>)<sup>23</sup>. All data contained in the  
115 FluPRINT dataset are made freely available through the Shared Data Portal on  
116 ImmPort repository. In all studies, except for study SLVP015, vaccine was  
117 administered only once. The study SLVP015 was longitudinal study where  
118 participants received vaccine in consecutive years from 2007-2015. In all studies,  
119 healthy participants were included, and in some studies (SLVP017 for the 2010, 2011  
120 and 2013, SLVP021 and SLVP029) those that were vaccinated in the prior influenza  
121 season were excluded. A total of 121 CSV files containing processed data from various  
122 assays and studies were downloaded from SDM. The link to the 121 CSV files is  
123 provided on Zenodo<sup>24</sup>. **Table 2** provides a summary of the demographic characteristics  
124 of the FluPRINT study population. The population spans a wide age range, from a 1-  
125 year-old to a 90-year-old, with a median age of 27 years. Among 740 individuals with  
126 available experimental data, 446 were females and 294 males. The majority (491) of  
127 the individuals were of European ancestry. The complete demographic information is

128 available on the Zenodo<sup>25</sup>. Individuals were stratified into high and low responders,  
129 depending on their HAI antibody titers measured before and after vaccination, as  
130 described below. **Figure 2** shows demographic information for the FluPRINT study  
131 population, including gender, ethnicity, cytomegalovirus (CMV) status, and age  
132 stratified by the outcome to vaccination. Out of 363 individuals with measured HAI  
133 responses, 111 were identified as high responders and 252 as low responders. Overall,  
134 no major differences in the gender, ethnicity distribution, or CMV status (**Fig. 2a**) or  
135 age (**Fig. 2b**) were observed between high and low responders.

136 **Assays and data processing.** All data used were analysed and processed at  
137 the HIMC<sup>26</sup>. The distribution of assays performed across clinical studies and years is  
138 illustrated in **Fig. 1b**. Overall, SLVP015 was the longest study, running from 2007 to  
139 2014, spanning 135 unique individuals, while the majority of samples (249) came from  
140 the SLVP018 study (**Fig. 1**). Raw data, including report files, standards, controls,  
141 antibodies used are available at ImmPort (<https://import.niaid.nih.gov/>) under  
142 identification numbers for each study provided in the **Table 1**. **Table 3** provides  
143 information about all assays performed, protocols, validations used and references to  
144 the published manuscripts using the data. Protocols for all assays are available online  
145 at the HIMC website (<https://iti.stanford.edu/himc/protocols.html>).

146 **Multiplex cytokine assay.** Multiplex ELISA using Luminex was performed  
147 using either polystyrene bead (for 51/52-plex) or magnetic bead kits (62/63-plex)  
148 (eBioscience/Affymetrix). The processed Luminex data available in the FluPRINT is  
149 normalized at the plate level to mitigate batch and plate effects<sup>26</sup>. The two median  
150 fluorescence intensity (MFI) values for each sample for each analyte were averaged,  
151 and then log-base 2 transformed. Z-scores ((value–mean)/standard deviation) were  
152 computed, with means and standard deviations computed for each analyte for each  
153 plate. Thus, units of measurement were Zlog2 for serum Luminex. Part of the Luminex  
154 data was used in previous publications<sup>9,10,22,27,28</sup>. In 2009 and 2010, for SLVP015 and  
155 SLVP018 studies, serum analytes were analysed using MSD 4- and 9-plex kits (V-  
156 PLEX Human Proinflammatory Panel II, Mesoscale, Cat No K15053D and Human  
157 ProInflammatory 9-Plex Ultra-Sensitive Kit, Mesoscale, Cat No K15007C) as according  
158 to the manufacturer’s protocol. The assay named ‘Other Luminex’ was performed only  
159 for study SLVP015 in 2007 using the Human 42-Plex Polystyrene Kit (EMD Millipore,  
160 H42; MPXHCYTO060KPMX42) and data was processed in the same way as for the  
161 Luminex assays described above (measurement units reported were Zlog2)<sup>28</sup>.

162 **Hemagglutination inhibition assay.** Serum antibody titers before vaccination  
163 and day 28 after vaccination were measured by HAI assay<sup>29</sup> using strains of influenza  
164 contained in the vaccines<sup>9,10,27</sup>. Geometric mean titers (GMT) were calculated for all

165 strains of the virus contained in the vaccine, while fold change is calculated as: GMT  
166 for all vaccine strains on day 28 / GMT for all vaccine strains on day 0. High responders  
167 were determined as individuals that seroconverted (4-fold or greater rise in HAI titer)  
168 and were seroprotected (GMT HAI  $\geq$  40).

169 **Virological assays.** CMV and Epstein-Barr virus (EBV) analysis was  
170 performed using CMV IgG ELISA (Calbiotech, Cat No CM027G) and EBV-VCA IgG  
171 ELISA (Calbiotech, Cat No EVO10G), following manufacturer's protocols<sup>10,27,30</sup>.

172 **Immunophenotyping.** Immunophenotyping was performed either with flow  
173 cytometry (Lyoplate)<sup>27,30</sup> or mass cytometry (CyTOF)<sup>30-32</sup>. Data was analysed using  
174 FlowJo software using the standard templates. Gates were adjusted on a donor-  
175 specific basis, if necessary, to control for any differences in background or positive  
176 staining intensity. The statistics was exported for each gated population to a  
177 spreadsheet. The percentage of each cell type is determined and reported as a percent  
178 of the parent cell type.

179 **Phosphorylation-specific cytometry.** Phospho-flow assays were performed  
180 either using flow cytometry on PBMC (for studies SLVP015, SLVP018 and SLVP021  
181 from 2007 to 2012)<sup>9,10,27,28,30</sup> or mass cytometry on whole blood (for studies SLVP015,  
182 SLVP018 and SLVP021 in 2013)<sup>33,34</sup>. The percentage of each cell type is determined  
183 and reported as a percent of the parent cell type. Median values are reported to  
184 quantitate the level of phosphorylation of each protein in response to stimulation. For  
185 phospho-flow data acquired on flow cytometer a fold change value was computed as  
186 the stimulated readout divided by the unstimulated readout (e.g. 90th percentile of MFI  
187 of CD4<sup>+</sup> pSTAT5 IFN $\alpha$  stimulated / 90th percentile of CD4<sup>+</sup> pSTAT5 unstimulated  
188 cells), while for data acquired using mass cytometry a fold change was calculated by  
189 subtracting the arcsinh (intensity) between stimulated and unstimulated (arsinh stim –  
190 arcsinh unstim).

191 **Automated importer and data harmonization.** After collecting the data, a  
192 custom PHP script was generated to parse each of the 121 CSV files and to import  
193 data into the MySQL database. The source code for the script is available online at  
194 <https://github.com/LogIN-fluprint>. The script optimizes the data harmonization process  
195 essential for combining data from different studies. Control and nonsense data were  
196 not imported, such as "CXCR3-FMO CD8<sup>+</sup> T cells", "nonNK-nonB-nonT-  
197 nonmonocyte-nonbasophils", "viable", etc. To standardize data, the original CSV  
198 entries were cleaned into the MySQL database readable format (e.g. quotes and  
199 parenthesis replaced with underscores, "+" with text "positive", etc.). Additionally,  
200 classifications for ethnicity (**Table 4**), vaccine names (**Table 5**) and vaccination history  
201 (**Table 6**) were resolved into standard forms, while assays were numerated (**Table 7**).

202 For example, "Fluzone single-dose syringe" and "Fluzone single-dose syringe 2009-  
203 2010" were mapped to "Fluzone" and given number 4 (**Table 5**). In all studies, vaccines  
204 were given intramuscularly for IIV and intranasally for LAIV, except for one study where  
205 IIV was given intradermally and this was labelled as Fluzone Intradermal and given  
206 number 2. During data merging, we replaced text strings with binary values. For  
207 example, for the variable of gender, female and male were replaced with zero and one.  
208 To be able to distinguish between visits in consecutive years, a unique visit  
209 identification was calculated. For the original internal visit data, each visit in one year  
210 was labelled as V1 for day zero and V2 for day seven. However, if the same individual  
211 came in the consecutive year, day zero visit would again be labelled V1, and day seven  
212 as visit V2, causing repetition of values. To avoid such repetitions in the database, we  
213 generated a unique visit ID. Therefore, for the above example, first visit in the first year  
214 would be labelled V1 for day zero and V2 for day seven, but for the next year visits  
215 would be labelled as V3 for day zero and V4 for day seven. To distinguish between  
216 Luminex assays, the prefix L50 was given to each analyte analysed with the 51/52-  
217 plex Luminex kit. Finally, we imputed new values and calculated the vaccine outcome  
218 parameter using HAI antibody titers. High responders were determined as individuals  
219 that have HAI antibody titer for all vaccine strains  $\geq 40$  after vaccination and GMT HAI  
220 fold change  $\geq 4$ , following FDA guidelines for evaluation of vaccine efficacy<sup>2</sup>. Vaccine  
221 outcome was expressed as a binary value: high responders were given value of one  
222 and low responders the value zero.

223 **Generating tables.** To build FluPRINT database, we generated four tables, as  
224 shown in **Figure 3. Table 8** depicts characteristics of the FluPRINT database. In the  
225 table *donor*, each row represents an individual given a unique encrypted identification  
226 number (study donor ID). Other fields provide information about the clinical study in  
227 which an individual was enrolled (study ID and study internal ID), gender and race. The  
228 second table, named *donor\_visits* describes information about the donor's age, CMV  
229 and EBV status, Body Mass Index (BMI) and vaccine received on each clinical visit.  
230 Each clinical visit was given a unique identification (visit ID) in addition to the internal  
231 visit ID (provided by the clinical study) to distinguish between visits in consecutive  
232 years. For each visit, we calculated vaccine response by measuring HAI antibody  
233 response. Information about vaccine outcome is available as geometric mean titers  
234 (geo\_mean), difference in the geometric mean titers before and after vaccination  
235 (delta\_geo\_mean), and difference for each vaccine strain (delta\_single). In the last  
236 field, each individual is classified as high and low responder (vaccine\_resp). On each  
237 visit, samples were analysed and information about which assays were performed  
238 (assay field) and value of the measured analytes (units and data) are stored in the

239 **experimental\_data** table. Finally, the **medical\_history** table describes information  
240 connected with each clinical visit about usage of statins (statin\_use) and if influenza  
241 vaccine was received in the past (influenza vaccine history), if yes, how many times  
242 (total\_vaccines\_received). Also, we provide information which type of influenza  
243 vaccine was received in the previous years (1 to 5 years prior enrolment in the clinical  
244 study). Lastly, information about influenza infection history and influenza-related  
245 hospitalization is provided.

## 246 **Code availability**

247 The source code for the PHP script and database schema are available from a  
248 public github repository (<https://github.com/LogIN-fluprint>). Raw data files used to  
249 generate dataset are provided as single compressed file on Zenodo<sup>24</sup>. Full study  
250 population with demographic characteristics is provided as single CSV file<sup>25</sup>.  
251 Additionally, entire FluPRINT database export is available as CSV table and SQL file<sup>35</sup>.  
252 Database is also accessible at the project website <https://fluprint.com>.

## 253 **Data Records**

254 The FluPRINT dataset described herein is available online for use by the  
255 research community and can be downloaded directly from a research data repository  
256 Zenodo<sup>35</sup>. Additionally, the dataset can be imported in the MySQL database for further  
257 manipulation and data extraction. The instructions how to import FluPRINT into the  
258 database are available at github (<https://github.com/LogIN-fluprint>). The summary of  
259 the dataset, including the number of observations, fields and description for each table  
260 is provided in **Table 8**.

## 261 **Technical Validation**

262 The objective of the current study was to ensure that the FluPRINT dataset accurately  
263 reflects processed data available in SDM. Technical data validation was carried in  
264 previous published studies referred in the **Table 3**. Data was downloaded from the  
265 original source, and here we focused on ensuring that data records were accurately  
266 harmonized, merged and mapped in the unifying FluPRINT database.

267 The FluPRINT dataset was validated on two levels: (1) upon insertion and (2) after the  
268 data was inserted into the database. To validate data on insertion, we created loggers  
269 to monitor import of the CSV files into the database. This ensured easier and more  
270 effective troubleshooting of potential problems and contributed to the monitoring of the  
271 import process. Two different sets were used: (1) informative and (2) error loggers.  
272 Informative loggers provided information about which processing step has started or



273 finished and how many samples have been processed in that particular step. This  
274 allowed us to monitor that correct number of samples was processed. Error loggers  
275 provided exact identification and name of the data which could not be imported into the  
276 database, usually caused by missing or incorrect user input, such as "...assay is  
277 missing. Skipping ...'\$row'". This facilitated the process to identify erroneous data,  
278 which were then manually reviewed, corrected, and updated.

279         Once the database was built, a manual review of data was performed to ensure  
280 accuracy and integrity of the dataset. Several random individuals were chosen and the  
281 accuracy of data was evaluated by comparison with the raw data. Additionally, we  
282 evaluated total number of all donors, assays performed, clinical studies and years with  
283 the raw data available at the SDM.

## 284 **Usage Notes**

285         Recent advances in the computational biology and the development of novel  
286 machine learning algorithms, especially deep learning, make it possible to extract  
287 knowledge and identify patterns in an unbiased manner from large clinical datasets.  
288 Application of machine learning algorithms to clinical datasets can reveal biomarkers  
289 for different diseases, therapies<sup>36</sup>, including vaccinations<sup>8,9,12</sup>. The data from the  
290 FluPRINT study can be used to identify cellular and molecular baseline biomarkers that  
291 govern successful antibody response to influenza vaccines (IIV and LAIV) across  
292 different influenza seasons and a broad age population. The HAI antibody response to  
293 influenza vaccines is considered as an alternative way to compare efficacy of the  
294 vaccines in susceptible groups where placebo-controlled clinical efficacy study cannot  
295 be performed. Since FluPRINT dataset is provided as a database, this facilitates further  
296 analysis. Queries can be easily performed to obtain a single CSV file. For example,  
297 researchers interested in understanding which immune cells and chemokines can  
298 differentiate between high and low responders that received inactivated influenza  
299 vaccine could search the FluPRINT database. In the database, they can find all donors  
300 for which flow cytometry or mass cytometry were performed together with Luminex  
301 assays, for which donors the HAI response was measured, and all the donors who  
302 received inactivated influenza vaccine. The resulting CSV file can then easily be used  
303 for downstream analysis.

304         Major advantages of this dataset are the mapping of the vaccine outcome,  
305 classifying individuals as high or low responders, standardization of the data from  
306 different clinical studies, and from different assays. This data harmonization process  
307 allows for direct comparison of immune cell frequency, phenotype, and functionality  
308 and quantity of chemokines and cytokines shared between individuals before or after

309 influenza vaccinations. By releasing the FluPRINT database and the source code, we  
310 provide users with the ability to continue building upon this resource and to update the  
311 database with their data and other databases.

## 312 **Acknowledgements**

313 We are grateful to all individuals that participated in the research studies. We  
314 appreciate helpful discussions from all members of the Davis and Y. Chien labs. We  
315 also thank all staff members from the HIMC (Yael Rosenberg-Hasson, Michael D.  
316 Leipold and Weiqi Wang) for data analysis, management and helpful discussions,  
317 HIMC Biobank (Rohit Gupta and Janine Bodea Sung) for sample processing and  
318 storage, Stanford-LPCH Vaccine Program (Alison Holzer and Savita Kamble) for  
319 management of clinical studies. The Clinical and Translational Research Unit at  
320 Stanford University was supported by an NIH/NCRR CTSA award UL1 RR025744.  
321 This work was supported by NIH grants (U19 AI090019, U19 AI057229) and the  
322 Howard Hughes Medical Institute to M.M.D, and by the EU's Horizon 2020 research  
323 and innovation program under the Marie Skłodowska-Curie grant (FluPRINT, Project  
324 No 796636) to A.T.

## 325 **Author contributions**

326 A.T. downloaded data, coordinated the integration of the data into the FluPRINT  
327 database, advised on the database design and wrote the manuscript. I.T. built the  
328 MySQL database and wrote PHP script for the data import into the database, and  
329 contributed to writing the manuscript. H.T.M. managed the analysis, data collection and  
330 management of the SDM at the HIMC and advised during the manuscript preparation.  
331 C.L.D. was responsible for regulatory approvals, protocol design, study conduct,  
332 clinical data management and provided assistance during the manuscript preparation.  
333 M.M.D. conceived and supervised clinical studies and advised during the manuscript  
334 preparation.

## 335 **Competing interests**

336 The authors declare that they have no conflict of interests.

## 337 **Figures**

338 Figure 1. Overview of the FluPRINT dataset.

339 Figure 2. Demographic characteristics for the FluPRINT study population stratified by  
340 the vaccination outcome.

341 Figure 3. The FluPRINT database model.

## 342 **Figure Legends**

343 **Figure 1. Overview of the FluPRINT dataset.** The FluPRINT dataset consists  
344 of the 740 individuals from 8 clinical studies (SLVP015, SLVP017, SLVP018,  
345 SLVP021, SLVO024, SLVP028, SLVP029 and SLVP030) and 8 influenza seasons  
346 (from 2017 to 2015). **(a)** Pie chart shows distribution of donors across clinical studies.  
347 The dataset contains harmonized data from different assays, including mass and flow  
348 cytometry, phosphorylated cytometry (Phospho-flow), multiplex ELISA (Luminex  
349 assay), clinical lab tests, such as complete blood test, analysis of hormones and  
350 virological assays (CMV and EBV antibody titers) and serological profiling with  
351 hemagglutination inhibition assay, which was used to define high and low responders.  
352 **(b)** Distribution of assays across years available for each clinical study.

353 **Figure 2. Demographic characteristics for the FluPRINT study population**  
354 **stratified by the vaccination outcome.** Distribution of individuals in the categories of  
355 high (red, n = 111) and low (grey, n = 252) responders regarding the **(a)** gender,  
356 ethnicity and CMV status **(b)** age distribution between high and low responders. Age  
357 is indicated in years.

358 **Figure 3. The FluPRINT database model.** The diagram shows a schema of  
359 the FluPRINT database. Core tables, donors (red), donor\_visits (yellow),  
360 experimental\_data (blue) and medical\_history (green) are interconnected. Tables  
361 experimental\_data and medical\_history are connected to the core table donor\_visits.  
362 The data fields for each table are listed, including the name and the type of the data.  
363 CHAR and VARCHAR, string data as characters; INT, numeric data as integers;  
364 FLOAT, approximate numeric data values; DECIMAL, exact numeric data values;  
365 DATETIME, temporal data values; TINYINT, numeric data as integers (range 0-255);  
366 BOOLEAN, numeric data with Boolean values (zero/one). Maximal number of  
367 characters allowed in the data fields is denoted as number in parenthesis.

368 **Tables**

369 **Table 1. Characteristics of the clinical studies included in the FluPRINT dataset.**

| Stanford study ID | ClinicalTrials.gov ID                     | Name                                                                                          | Description                                                                                                                                                                                                                                                          | Vaccines                                                                                                                                                                                                                   | Data in FluPRINT                                                                                                                                                                                                                                                                                   | ImmPort ID (www.immport.org)                                                                                                                        | Ref.          |
|-------------------|-------------------------------------------|-----------------------------------------------------------------------------------------------|----------------------------------------------------------------------------------------------------------------------------------------------------------------------------------------------------------------------------------------------------------------------|----------------------------------------------------------------------------------------------------------------------------------------------------------------------------------------------------------------------------|----------------------------------------------------------------------------------------------------------------------------------------------------------------------------------------------------------------------------------------------------------------------------------------------------|-----------------------------------------------------------------------------------------------------------------------------------------------------|---------------|
| SLVP015           | NCT01827462                               | Comparison of immune responses to influenza vaccine in adults of different ages (2007 - 2017) | <p><b>Who:</b> 18-100yo healthy participants</p> <p><b>How:</b> immunized annually with the seasonal inactivated influenza vaccines from 2007-2017</p> <p><b>When:</b> Blood samples acquired before immunization (Day 0), on days 6-8 and 28 after immunization</p> | <p><b>2007-2013</b><br/>Seasonal trivalent, inactivated influenza vaccines (Fluzone)</p> <p><b>2014-2015</b><br/>High Dose trivalent Fluzone for participants ≥ 65yo and quadrivalent Fluzone for younger participants</p> | <p><b>135 donors</b><br/>Assays:<br/>51-plex<br/>Luminex<br/>62-plex<br/>Luminex<br/>MSD 4plex<br/>MSD9plex<br/>Other<br/>Luminex<br/>HAI<br/>CMV/EBV<br/>Hormones<br/>CyTOF<br/>phenotype<br/>Lyoplate<br/>Phospho<br/>Cytof pheno<br/>Phospho<br/>cytof<br/>phospho<br/>Phosphoflow<br/>CBCD</p> | <p>SDY887 (2007)<br/>SDY212 (2008)<br/>SDY312 (2009)<br/>SDY311 (2010)<br/>SDY112 (2011)<br/>SDY315 (2012)<br/>SDY478 (2013)<br/>SDY1464 (2014)</p> | 8-10,28,37-46 |
| SLVP017           | NCT02133781<br>NCT03020498<br>NCT03020537 | B-cell immunity to influenza (2009- 2011 and 2013)                                            | <p><b>Who:</b><br/>1-2yo (2013), 8-100yo healthy participants who did not receive the seasonal influenza</p>                                                                                                                                                         | <p><b>2009-2011</b><br/>Seasonal trivalent, inactivated influenza vaccines (Fluzone) or seasonal live,</p>                                                                                                                 | <p><b>153 donors</b><br/>Assays:<br/>51-plex<br/>Luminex</p>                                                                                                                                                                                                                                       | <p>SDY1467(2009)<br/>SDY1468(2010)<br/>SDY1469(2011)<br/>SDY1470(2012)<br/>SDY1471(2013)</p>                                                        | 27,47-50      |

| Stanford study ID | ClinicalTrials.gov ID                                                   | Name                                                                         | Description                                                                                                                                                                                                                                                                                      | Vaccines                                                                                                                                                                                                                                                                                                            | Data in FluPRINT                                                                                                                                                                                                   | ImmPort ID (www.immport.org)                                                   | Ref.        |
|-------------------|-------------------------------------------------------------------------|------------------------------------------------------------------------------|--------------------------------------------------------------------------------------------------------------------------------------------------------------------------------------------------------------------------------------------------------------------------------------------------|---------------------------------------------------------------------------------------------------------------------------------------------------------------------------------------------------------------------------------------------------------------------------------------------------------------------|--------------------------------------------------------------------------------------------------------------------------------------------------------------------------------------------------------------------|--------------------------------------------------------------------------------|-------------|
|                   |                                                                         |                                                                              | <p>vaccine in previous years (2010, 2011 and 2013)</p> <p><b>How:</b> immunized with either seasonal inactivated or live, attenuated influenza vaccines in 2009, 2010, 2011 and 2013</p> <p><b>When:</b> Blood samples acquired before immunization (Day 0) and on day 28 after immunization</p> | <p>attenuated influenza vaccine (FluMist)</p> <p><b>2013</b><br/>Seasonal trivalent inactivated influenza vaccine- (Fluzone) - pediatric formulation for 1-2yo children</p>                                                                                                                                         | <p>62-plex<br/>Luminex<br/>HAI<br/>CMV/EBV<br/>CyTOF<br/>phenotype<br/>CBCD</p>                                                                                                                                    |                                                                                |             |
| SLVP018           | NCT01987349<br>NCT03022396<br>NCT03022422<br>NCT03022435<br>NCT03023176 | T-cell and general immune response to seasonal influenza vaccine (2009-2013) | <p><b>Who:</b> 1-8yo (2013), 8-100yo healthy participants</p> <p><b>How:</b> immunized with either seasonal inactivated or live, attenuated influenza vaccines from 2009-2013</p> <p><b>When:</b> Blood samples acquired before immunization (Day 0), days 7-10 and 28 after immunization</p>    | <p><b>2009-2010</b><br/>Seasonal trivalent inactivated influenza vaccine (Fluzone) or seasonal trivalent live attenuated influenza vaccine (FluMist)</p> <p><b>2010</b><br/>High Dose trivalent Fluzone for participants ≥ 65yo</p> <p><b>2013</b><br/>Seasonal trivalent, inactivated influenza Pediatric Dose</p> | <p><b>249 donors</b><br/>Assays:<br/>51-plex<br/>Luminex<br/>62-plex<br/>Luminex<br/>MSD 4plex<br/>MSD 9plex<br/>HAI<br/>CMV/EBV<br/>Hormones<br/>CyTOF<br/>phenotype<br/>Lyoplate<br/>Phospho<br/>Cytof pheno</p> | SDY514(2009)<br>SDY515(2010)<br>SDY519(2011)<br>SDY1465(2012)<br>SDY1466(2013) | 27,44,51-57 |

| Stanford study ID | ClinicalTrials.gov ID | Name                                                                               | Description                                                                                                                                                                                                                                                                                                                                                                                                      | Vaccines                                                                                                                                                                                                                        | Data in FluPRINT                                                                                                                                                                                                                    | ImmPort ID (www.immport.org)                                      | Ref.  |
|-------------------|-----------------------|------------------------------------------------------------------------------------|------------------------------------------------------------------------------------------------------------------------------------------------------------------------------------------------------------------------------------------------------------------------------------------------------------------------------------------------------------------------------------------------------------------|---------------------------------------------------------------------------------------------------------------------------------------------------------------------------------------------------------------------------------|-------------------------------------------------------------------------------------------------------------------------------------------------------------------------------------------------------------------------------------|-------------------------------------------------------------------|-------|
|                   |                       |                                                                                    |                                                                                                                                                                                                                                                                                                                                                                                                                  | (Fluzone, 0.25ml) for 1-8yo children                                                                                                                                                                                            | Phospho<br>cytof<br>phospho<br>Phosphoflow<br>CBCD                                                                                                                                                                                  |                                                                   |       |
| SLVP021           | NCT02141581           | Plasmablast trafficking and antibody response in influenza vaccination (2011-2014) | <p><b>Who:</b> 8-34yo healthy participants who did not receive the seasonal influenza vaccine in previous years</p> <p><b>How:</b> immunized with either seasonal inactivated influenza vaccines given intramuscularly or intradermally and live, attenuated influenza vaccines from 2011-2014</p> <p><b>When:</b> Blood samples acquired before immunization (Day 0), days 6-8 and 24-32 after immunization</p> | <p><b>2011-2014</b><br/>Seasonal trivalent inactivated influenza vaccine (Fluzone) given either intramuscularly or intradermally</p> <p><b>2011-2012</b><br/>Seasonal trivalent live attenuated influenza vaccine (FluMist)</p> | <p><b>84 donors</b><br/>Assays:<br/>51-plex<br/>Luminex<br/>62-plex<br/>Luminex<br/>HAI<br/>CMV/EBV<br/>Hormones<br/>CyTOF<br/>phenotype<br/>Phospho<br/>Cytof pheno<br/>Phospho<br/>cytof<br/>phospho<br/>Phosphoflow<br/>CBCD</p> | SDY113 (2011)<br>SDY305 (2012)<br>SDY472 (2013)<br>SDY1479 (2014) | 58-60 |
| SLVP024           | NCT03023683           | Protective mechanisms against a pandemic respiratory virus (2012)                  | <p><b>Who:</b> 2-49yo healthy participants</p> <p><b>How:</b> immunized with the seasonal live, attenuated influenza vaccine</p>                                                                                                                                                                                                                                                                                 | Seasonal live, attenuated influenza vaccine (FluMist)                                                                                                                                                                           | <p><b>Donors: 8</b><br/>Assays:<br/>HAI<br/>Phosphoflow</p>                                                                                                                                                                         | SDY1472                                                           |       |

| Stanford study ID | ClinicalTrials.gov ID | Name                                                                                   | Description                                                                                                                                                                                                                                                                      | Vaccines                                                                                                                           | Data in FluPRINT                                                                                       | ImmPort ID (www.immport.org)     | Ref. |
|-------------------|-----------------------|----------------------------------------------------------------------------------------|----------------------------------------------------------------------------------------------------------------------------------------------------------------------------------------------------------------------------------------------------------------------------------|------------------------------------------------------------------------------------------------------------------------------------|--------------------------------------------------------------------------------------------------------|----------------------------------|------|
|                   |                       |                                                                                        | <p><b>When:</b> Blood samples only from 18-42yo adults acquired before immunization (Day 0), days 7 and 28 after immunization</p>                                                                                                                                                |                                                                                                                                    |                                                                                                        |                                  |      |
| SLVP028           | NCT03088904           | Genetic and environmental factors in the response to influenza vaccination (2014-2018) | <p><b>Who:</b> 12-49yo healthy participants</p> <p><b>How:</b> immunized with either seasonal inactivated or live, attenuated influenza vaccines from 2014-2018</p> <p><b>When:</b> Blood samples acquired before immunization (Day 0), days 6-8 and 28+7 after immunization</p> | Seasonal quadrivalent inactivated influenza vaccine (Fluzone) or seasonal quadrivalent live attenuated influenza vaccine (FluMist) | <b>Donors: 52</b><br>Assays:<br>62-plex<br>Luminex<br>HAI<br>CMV/EBV<br>Hormones<br>CyTOF<br>phenotype | SDY1480 (2014)<br>SDY1481 (2015) |      |
| SLVP029           | NCT03028974           | Innate and acquired immunity to influenza infection and immunization (2014-2017)       | <p><b>Who:</b> 6 mo-49yo healthy participants (who did not receive LAIV in the prior season nor received influenza immunizations in two or more prior seasons)</p> <p><b>How:</b> immunized with either seasonal</p>                                                             | Seasonal quadrivalent inactivated influenza vaccine (Fluzone) or seasonal quadrivalent live attenuated influenza vaccine (FluMist) | <b>Donors: 47</b><br>Assays:<br>62-plex<br>Luminex<br>HAI<br>CMV/EBV<br>Hormones<br>CyTOF<br>phenotype | SDY1482 (2014)<br>SDY1483 (2015) |      |

| Stanford study ID | ClinicalTrials.gov ID | Name                                                                                                     | Description                                                                                                                                                                                                                                                                             | Vaccines                                                                                                                                                                                                                                        | Data in FluPRINT                                                                                       | ImmPort ID (www.immport.org) | Ref. |
|-------------------|-----------------------|----------------------------------------------------------------------------------------------------------|-----------------------------------------------------------------------------------------------------------------------------------------------------------------------------------------------------------------------------------------------------------------------------------------|-------------------------------------------------------------------------------------------------------------------------------------------------------------------------------------------------------------------------------------------------|--------------------------------------------------------------------------------------------------------|------------------------------|------|
|                   |                       |                                                                                                          | <p>inactivated or live, attenuated influenza vaccines from 2014-2017</p> <p><b>When:</b> Blood samples acquired before immunization (Day 0), days 7 and 28 after immunization</p>                                                                                                       |                                                                                                                                                                                                                                                 |                                                                                                        |                              |      |
| SLVP030           | NCT03453801           | The role of CD4+ memory phenotype, memory, and effector t cells in vaccination and infection (2014-2019) | <p><b>Who:</b> 6 mo-10yo healthy participants</p> <p><b>How:</b> immunized annually with either seasonal inactivated or live, attenuated influenza vaccines from 2014-2019</p> <p><b>When:</b> Blood samples acquired before immunization (Day 0), days 7 and 60 after immunization</p> | <p>Seasonal quadrivalent inactivated influenza vaccine (Fluzone) or seasonal quadrivalent live attenuated influenza vaccine (FluMist)</p> <p>Seasonal trivalent, inactivated influenza Pediatric Dose (Fluzone, 0.25ml) for 6-35mo children</p> | <b>Donors: 12</b><br>Assays:<br>62-plex<br>Luminex<br>HAI<br>CMV/EBV<br>Hormones<br>CyTOF<br>phenotype | SDY1484 (2014)               |      |



371 **Table 2. Demographic characteristics for the FluPRINT study population.**

| <b>Age (y)</b>                        |              |
|---------------------------------------|--------------|
| Mean ± SD                             | 38 ± 25      |
| Median (min. to max. range)           | 27 (1-90)    |
| <b>Gender</b>                         |              |
| Male (%)                              | 294 (39.7%)  |
| Female (%)                            | 446 (60.3%)  |
| <b>Ethnicity</b>                      |              |
| European American (%)                 | 491 (66.35%) |
| African American (%)                  | 13 (1.75%)   |
| American Indian and Alaska Native (%) | 3 (0.4%)     |
| Asian (%)                             | 86 (11.6%)   |
| Hispanic or Latino (%)                | 5 (0.7%)     |
| Other (%)                             | 137 (18.5%)  |
| Unknown (%)                           | 5 (0.7%)     |

372 **Table 3. Assays performed.**

| <b>Assays</b>      | <b>Protocols</b>                                                             | <b>Validations</b>                                                                                                                                                                                                                                   | <b>Ref.</b>   |
|--------------------|------------------------------------------------------------------------------|------------------------------------------------------------------------------------------------------------------------------------------------------------------------------------------------------------------------------------------------------|---------------|
| 51/52-plex Luminex | HIMC website: "Luminex-Polystyrene bead kits/Luminex"                        | Report file available at ImmPort ( <a href="https://immport.niaid.nih.gov/">https://immport.niaid.nih.gov/</a> ) contains all information of standards, Curve fitting, Bead counts to examine quality of assay and CV of both samples and standards. | 9,10,22,27,28 |
| 62/63-plex Luminex | HIMC website "Luminex – eBioscience/Affymetrix Magnetic bead Kits"           |                                                                                                                                                                                                                                                      |               |
| MSD 4-plex         | V-PLEX Human Proinflammatory Panel II (Mesoscale, Cat No K15053D)            | Manufacturer standards                                                                                                                                                                                                                               | 22            |
| MSD 9-plex         | Human ProInflammatory 9-Plex Ultra-Sensitive Kit (Mesoscale, Cat No K15007C) |                                                                                                                                                                                                                                                      |               |
| Other Luminex      | Human 42-Plex Polystyrene Kit (EMD Millipore, H42; MPXHICYTO060KPMX42)       | Report file available at ImmPort ( <a href="https://immport.niaid.nih.gov/">https://immport.niaid.nih.gov/</a> ) contains all information of standards, Curve fitting, Bead counts to examine quality of assay and CV of both samples and standards. | 28            |

| Assays                      | Protocols                                                                                                           | Validations                                                                                                                                                                                                                                                          | Ref.                               |
|-----------------------------|---------------------------------------------------------------------------------------------------------------------|----------------------------------------------------------------------------------------------------------------------------------------------------------------------------------------------------------------------------------------------------------------------|------------------------------------|
| HAI                         | HIMC website<br>"Hemagglutinin inhibition (HAI) assay"                                                              | Sample, virus control, HIMC human control serum (CONS2) and control PBS available at ImmPort.                                                                                                                                                                        | 9,10,27                            |
| CMV/EBV                     | CMV IgG ELISA (Calbiotech, Cat No CM027G)<br>EBV-VCA IgG ELISA (Calbiotech, Cat No EVO10G)                          | Manufacturer standards                                                                                                                                                                                                                                               | 10,27,30                           |
| Hormones                    | Free Testosterone ELISA Kit (Calbiotech) and Custom Steroid Hormone Panel (human) Assay Kit (Mesosclae, MSD 4-plex) | Manufacturer standards                                                                                                                                                                                                                                               | 8                                  |
| CyTOF phenotype             | HIMC website<br>"CyTOF Immunophenotyping/ CyTOF phenotyping"                                                        | Data analysed using FlowJo software. Gates were adjusted on a donor-specific basis. The statistics for each gated population was exported to an Excel spreadsheet. The percentage of each cell type is determined and reported as a percent of the parent cell type. | 27,30<br><b>Protocols</b><br>31,32 |
| Lyoplate                    | HIMC website:<br>"Flow cytometry phenotyping"                                                                       |                                                                                                                                                                                                                                                                      | 27,30                              |
| Phospho-CyTOF (whole blood) | HIMC website<br>"Whole blood phospho-CyTOF/ Phosphoflow whole blood CYTOF"                                          | The percentage of each cell type was determined and reported as a percent of the parent cell type. Median values were reported to quantitate the level of phosphorylation of each protein in response to stimulation.                                                | <b>Protocol</b><br>34              |
| Phospho-flow                | HIMC website<br>"Phospho-flow-cytokine/ Phosphoepitope Flow Cytometry (Cytokine stimulation, pSTAT readouts)"       |                                                                                                                                                                                                                                                                      | 9,10,27,28,30                      |
| Blood count (CBCD)          | Clinical haematology test performed on a Coulter counter                                                            | Performed at the Stanford Clinical Lab                                                                                                                                                                                                                               | -                                  |

373 **Table 4. Remapping ethnicity.**

| Original                                              | Remapped                  |
|-------------------------------------------------------|---------------------------|
| Caucasian or White                                    | Caucasian                 |
| Caucasian or White,Asian                              | Other                     |
| Caucasian or White,Other                              | Other                     |
| Asian                                                 | Asian                     |
| Asian,Other                                           | Other                     |
| Other                                                 | Other                     |
| Caucasian or White,Black African American,Asian,Other | Other                     |
| Caucasian or White,Black African American             | Other                     |
| NULL                                                  | Other                     |
| Not Hispanic or Latino                                | Other                     |
| Non-Hispanic                                          | Other                     |
| Decline to answer                                     | Unknown                   |
| Black African American                                | Black or African American |

| Original                                             | Remapped                         |
|------------------------------------------------------|----------------------------------|
| Black African American,Asian                         | Other                            |
| Cauc or White,Black Af Am                            | Other                            |
| Caucasian or White,Pacific Islander                  | Other                            |
| Caucasian or White,Paclslan                          | Other                            |
| Cauc or White,Pacific Islander                       | Other                            |
| Pacific Islander,Asian                               | Other                            |
| American Indian/Alaska native,Caucasian or Wh        | Other                            |
| American Indian/Alaska native,Caucasian or White     | Other                            |
| American Indian/Alaska native,Black African American | Other                            |
| Am In/Alaska native,Cauc or W                        | Other                            |
| Am In/AlaskaNative,Black Af Am                       | Other                            |
| American Indian/Alaska native                        | American Indian or Alaska Native |
| Hispanic                                             | Hispanic/Latino                  |
| Hispanic or Latino                                   | Hispanic/Latino                  |

374 **Table 5. Remapping vaccine type.**

| Vaccine received                      | Vaccine type ID | Vaccine type name   |
|---------------------------------------|-----------------|---------------------|
| FluMist IIV4 0.2 mL intranasal spray  | 1               | Flumist             |
| FluMist Intranasal spray              | 1               | Flumist             |
| FluMist Intranasal Spray 2009-2010    | 1               | Flumist             |
| FluMist Intranasal Spray              | 1               | Flumist             |
| Flumist                               | 1               | Flumist             |
| Fluzone Intradermal-IIV3              | 2               | Fluzone Intradermal |
| Fluzone Intradermal                   | 2               | Fluzone Intradermal |
| GSK Fluarix IIV3 single-dose syringe  | 3               | Fluarix             |
| Fluzone 0.5 mL IIV4 SD syringe        | 4               | Fluzone             |
| Fluzone 0.25 mL IIV4 SD syringe       | 5               | Paediatric Fluzone  |
| Fluzone IIV3 multi-dose vial          | 4               | Fluzone             |
| Fluzone single-dose syringe           | 4               | Fluzone             |
| Fluzone multi-dose vial               | 4               | Fluzone             |
| Fluzone single-dose syringe 2009-2010 | 4               | Fluzone             |
| Fluzone high-dose syringe             | 6               | High Dose Fluzone   |
| Fluzone 0.5 mL single-dose syringe    | 4               | Fluzone             |
| Fluzone 0.25 mL single-dose syringe   | 5               | Paediatric Fluzone  |
| Fluzone IIV3 High-Dose SDS            | 6               | High Dose Fluzone   |
| Fluzone IIV4 single-dose syringe      | 4               | Fluzone             |
| Fluzone High-Dose syringe             | 6               | High Dose Fluzone   |

375 **Table 6. Remapping vaccination history.**

| Original                                                                    | Remapped |
|-----------------------------------------------------------------------------|----------|
| No                                                                          | 0        |
| Yes                                                                         | 1        |
| IIV injection/im                                                            | 2        |
| Doesn't know/doesn't remember/na/does not remember                          | 3        |
| LAIV4 intranasal/ laiv_std_intranasal/ laiv_std_intranasal/nasal/intranasal | 4        |

376 **Table 7. Assays in the database.**

| Original                          | Remapped |
|-----------------------------------|----------|
| CMV EBV                           | 1        |
| Other immunoassay                 | 2        |
| Human Luminex 62-63 plex          | 3        |
| CytoTOF phenotyping               | 4        |
| HAI                               | 5        |
| Human Luminex 51 plex             | 6        |
| Phospho-flow cytokine stim (PBMC) | 7        |
| pCyTOF (whole blood) pheno        | 9        |
| pCyTOF (whole blood) phospho      | 10       |
| CBCD                              | 11       |
| Human MSD 4 plex                  | 12       |
| Lyoplate 1                        | 13       |
| Human MSD 9 plex                  | 14       |
| Human Luminex 50 plex             | 15       |
| Other Luminex                     | 16       |

377 **Table 8. The characteristics of the FluPRINT database.**

| Table name               | Rows    | Columns | Description                                                                                                                                                                                                                                                                                                                                                                                                                                                                                                                                                                                                               |
|--------------------------|---------|---------|---------------------------------------------------------------------------------------------------------------------------------------------------------------------------------------------------------------------------------------------------------------------------------------------------------------------------------------------------------------------------------------------------------------------------------------------------------------------------------------------------------------------------------------------------------------------------------------------------------------------------|
| <i>donors</i>            | 740     | 6       | Each row in this table is one donor. Donor is described with 5 additional parameters that include unique identification ( <i>donor_id</i> and <i>study_donor_id</i> ), identification for the study ( <i>study_id</i> ), full internal name of the study ( <i>study_internal_id</i> ), gender and race.                                                                                                                                                                                                                                                                                                                   |
| <i>donor_visits</i>      | 2,937   | 18      | Each row represents a donor at the particular visit ( <i>visit_id</i> ). Additionally, information about internal visit identification ( <i>visit_internal_id</i> ), date of the visit ( <i>visit_year</i> and <i>visit_day</i> ), pre- or post-vaccination visit for HAI assay ( <i>visit_type_hai</i> ), age at the visit ( <i>age</i> and <i>age_round</i> ), CMV/EBV status, BMI index at the visit are provided. Additionally, type of vaccine received ( <i>vaccine</i> ) and other calculated measures for HAI assay ( <i>geo_mean</i> , <i>d_geo_mean</i> , <i>d_single</i> , <i>vaccine_resp</i> ) are provided. |
| <i>experimental_data</i> | 371,260 | 9       | Each row represents a donor at particular visit ( <i>donor_visits_id</i> ). At each visit, assay that was performed is listed ( <i>assay</i> ) along with the names and values for measured analytes ( <i>name</i> , <i>name_formatted</i> , <i>subset</i> , <i>units</i> and <i>data</i> ).                                                                                                                                                                                                                                                                                                                              |
| <i>Medical_history</i>   | 740     | 18      | Each row is one donor at first visit described by 15 additional parameters. These include usage of statins ( <i>statin_use</i> ) and history of receiving influenza vaccines ( <i>flu_vaccination_history</i> ). If donor received vaccination before enrollment, the survey information is provided about how many vaccines were received ( <i>total_vaccines_received</i> ), and the type of vaccines for each prior season                                                                                                                                                                                             |

| Table name | Rows | Columns | Description                                                                                                                                                                                       |
|------------|------|---------|---------------------------------------------------------------------------------------------------------------------------------------------------------------------------------------------------|
|            |      |         | (fields for the one year before enrolment: <i>vaccinated_1yr_prior</i> and <i>vaccine_type_1yr_prior</i> ). This information is provided for up to 5 years prior enrolment in the clinical study. |

378

## 379 References

- 380 1 Iuliano, A. D. *et al.* Estimates of global seasonal influenza-associated  
381 respiratory mortality: a modelling study. *Lancet* **391**, 1285-1300 (2018).
- 382 2 Food and Drug Administration. *Clinical Data Needed to Support the Licensure*  
383 *of Seasonal Inactivated Influenza Vaccines*, [https://www.fda.gov/regulatory-](https://www.fda.gov/regulatory-information/search-fda-guidance-documents/clinical-data-needed-support-licensure-seasonal-inactivated-influenza-vaccines)  
384 [information/search-fda-guidance-documents/clinical-data-needed-support-](https://www.fda.gov/regulatory-information/search-fda-guidance-documents/clinical-data-needed-support-licensure-seasonal-inactivated-influenza-vaccines)  
385 [licensure-seasonal-inactivated-influenza-vaccines](https://www.fda.gov/regulatory-information/search-fda-guidance-documents/clinical-data-needed-support-licensure-seasonal-inactivated-influenza-vaccines) (2007).
- 386 3 Zhou, H. *et al.* Hospitalizations associated with influenza and respiratory  
387 syncytial virus in the United States, 1993-2008. *Clinical infectious diseases : an*  
388 *official publication of the Infectious Diseases Society of America* **54**, 1427-1436  
389 (2012).
- 390 4 de Jong, J. C. *et al.* Haemagglutination-inhibiting antibody to influenza virus.  
391 *Developments in biologicals* **115**, 63-73 (2003).
- 392 5 Sridhar, S. *et al.* Cellular immune correlates of protection against symptomatic  
393 pandemic influenza. *Nat Med* **19**, 1305-1312 (2013).
- 394 6 Bentebibel, S. E. *et al.* Induction of ICOS+CXCR3+CXCR5+ TH cells correlates  
395 with antibody responses to influenza vaccination. *Science translational*  
396 *medicine* **5**, 176ra132 (2013).
- 397 7 Trieu, M. C. *et al.* Long-term Maintenance of the Influenza-Specific Cross-  
398 Reactive Memory CD4+ T-Cell Responses Following Repeated Annual  
399 Influenza Vaccination. *J Infect Dis* **215**, 740-749 (2017).
- 400 8 Furman, D. *et al.* Systems analysis of sex differences reveals an  
401 immunosuppressive role for testosterone in the response to influenza  
402 vaccination. *Proceedings of the National Academy of Sciences of the United*  
403 *States of America* **111**, 869-874 (2014).
- 404 9 Furman, D. *et al.* Apoptosis and other immune biomarkers predict influenza  
405 vaccine responsiveness. *Mol Syst Biol* **9**, 659 (2013).

- 406 10 Furman, D. *et al.* Cytomegalovirus infection enhances the immune response to  
407 influenza. *Science translational medicine* **7**, 281ra243 (2015).
- 408 11 Nakaya, H. I. *et al.* Systems Analysis of Immunity to Influenza Vaccination  
409 across Multiple Years and in Diverse Populations Reveals Shared Molecular  
410 Signatures. *Immunity* **43**, 1186-1198 (2015).
- 411 12 Nakaya, H. I. *et al.* Systems biology of vaccination for seasonal influenza in  
412 humans. *Nat Immunol* **12**, 786-795 (2011).
- 413 13 Sobolev, O. *et al.* Adjuvanted influenza-H1N1 vaccination reveals lymphoid  
414 signatures of age-dependent early responses and of clinical adverse events.  
415 *Nat Immunol* **17**, 204-213 (2016).
- 416 14 Nakaya, H. I. *et al.* Systems biology of immunity to MF59-adjuvanted versus  
417 nonadjuvanted trivalent seasonal influenza vaccines in early childhood.  
418 *Proceedings of the National Academy of Sciences of the United States of*  
419 *America* **113**, 1853-1858 (2016).
- 420 15 Tsang, J. S. *et al.* Global analyses of human immune variation reveal baseline  
421 predictors of postvaccination responses. *Cell* **157**, 499-513 (2014).
- 422 16 Hagan, T., Nakaya, H. I., Subramaniam, S. & Pulendran, B. Systems  
423 vaccinology: Enabling rational vaccine design with systems biological  
424 approaches. *Vaccine* **33**, 5294-5301 (2015).
- 425 17 Chattopadhyay, P. K., Gierahn, T. M., Roederer, M. & Love, J. C. Single-cell  
426 technologies for monitoring immune systems. *Nat Immunol* **15**, 128-135 (2014).
- 427 18 Galli, E. *et al.* The end of omics? High dimensional single cell analysis in  
428 precision medicine. *Eur J Immunol* (2019).
- 429 19 Bendall, S. C., Nolan, G. P., Roederer, M. & Chattopadhyay, P. K. A deep  
430 profiler's guide to cytometry. *Trends Immunol* **33**, 323-332 (2012).
- 431 20 Simoni, Y., Chng, M. H. Y., Li, S., Fehlings, M. & Newell, E. W. Mass cytometry:  
432 a powerful tool for dissecting the immune landscape. *Curr Opin Immunol* **51**,  
433 187-196 (2018).

- 434 21 Newell, E. W., Sigal, N., Bendall, S. C., Nolan, G. P. & Davis, M. M. Cytometry  
435 by time-of-flight shows combinatorial cytokine expression and virus-specific cell  
436 niches within a continuum of CD8+ T cell phenotypes. *Immunity* **36**, 142-152  
437 (2012).
- 438 22 Siebert, J. C., Munsil, W., Rosenberg-Hasson, Y., Davis, M. M. & Maecker, H.  
439 T. The Stanford Data Miner: a novel approach for integrating and exploring  
440 heterogeneous immunological data. *J Transl Med* **10**, 62 (2012).
- 441 23 Bhattacharya, S. *et al.* ImmPort, toward repurposing of open access  
442 immunological assay data for translational and clinical research. *Sci Data* **5**,  
443 180015 (2018).
- 444 24 Tomic, A. & Tomic, I. Raw data for the generation of the FluPRINT dataset.  
445 *Zenodo*, <http://doi.org/10.5281/zenodo.3213899> (2019).
- 446 25 Tomic, A. & Tomic, I. Characteristics of the individuals included in the FluPRINT  
447 dataset. *Zenodo*, <http://doi.org/10.5281/zenodo.3220934> (2019).
- 448 26 Whiting, C. C. *et al.* Large-Scale and Comprehensive Immune Profiling and  
449 Functional Analysis of Normal Human Aging. *Plos One* **10**, e0133627 (2015).
- 450 27 Brodin, P. *et al.* Variation in the human immune system is largely driven by non-  
451 heritable influences. *Cell* **160**, 37-47 (2015).
- 452 28 Shen-Orr, S. S. *et al.* Defective Signaling in the JAK-STAT Pathway Tracks with  
453 Chronic Inflammation and Cardiovascular Risk in Aging Humans. *Cell Syst* **3**,  
454 374-384 e374 (2016).
- 455 29 Hirst, G. K. The Quantitative Determination of Influenza Virus and Antibodies  
456 by Means of Red Cell Agglutination. *J Exp Med* **75**, 49-64 (1942).
- 457 30 Alpert, A. *et al.* A clinically meaningful metric of immune age derived from high-  
458 dimensional longitudinal monitoring. *Nat Med* **25**, 487-495 (2019).
- 459 31 Leipold, M. D. & Maecker, H. T. Phenotyping of Live Human PBMC using  
460 CyTOF Mass Cytometry. *Bio Protoc* **5** (2015).



- 461 32 Leipold, M. D. & Maecker, H. T. Mass cytometry: protocol for daily tuning and  
462 running cell samples on a CyTOF mass cytometer. *J Vis Exp*, e4398 (2012).
- 463 33 Fernandez, R. & Maecker, H. Cytokine-stimulated Phosphoflow of PBMC Using  
464 CyTOF Mass Cytometry. *Bio Protoc* **5** (2015).
- 465 34 Fernandez, R. & Maecker, H. Cytokine-Stimulated Phosphoflow of Whole  
466 Blood Using CyTOF Mass Cytometry. *Bio Protoc* **5** (2015).
- 467 35 Tomic, A. & Tomic, I. The FluPRINT database. *Zenodo*,  
468 <http://doi.org/10.5281/zenodo.3222451> (2019).
- 469 36 Krieg, C. *et al.* High-dimensional single-cell analysis predicts response to anti-  
470 PD-1 immunotherapy. *Nat Med* **24**, 144-153 (2018).
- 471 37 Price, J. V. *et al.* Characterization of Influenza Vaccine Immunogenicity Using  
472 Influenza Antigen Microarrays. *Plos One* **8** (2013).
- 473 38 Wang, C. *et al.* Effects of Aging, Cytomegalovirus Infection, and EBV Infection  
474 on Human B Cell Repertoires. *J Immunol* **192**, 603-611 (2014).
- 475 39 Jackson, K. J. L. *et al.* Human Responses to Influenza Vaccination Show  
476 Seroconversion Signatures and Convergent Antibody Rearrangements. *Cell*  
477 *Host Microbe* **16**, 105-114 (2014).
- 478 40 Looney, T. J. *et al.* Human B-cell isotype switching origins of IgE. *J Allergy Clin*  
479 *Immun* **137**, 579-+ (2016).
- 480 41 Haddon, D. J. *et al.* Mapping epitopes of U1-70K autoantibodies at single-amino  
481 acid resolution. *Autoimmunity* **48**, 513-523 (2015).
- 482 42 Furman, D. *et al.* Expression of specific inflammasome gene modules stratifies  
483 older individuals into two extreme clinical and immunological states. *Nat Med*  
484 **23**, 174-184 (2017).
- 485 43 de Bourcy, C. F. *et al.* Phylogenetic analysis of the human antibody repertoire  
486 reveals quantitative signatures of immune senescence and aging. *Proceedings*  
487 *of the National Academy of Sciences of the United States of America* **114**,  
488 1105-1110 (2017).

- 489 44 Kay, A. W. *et al.* Pregnancy Does Not Attenuate the Antibody or Plasmablast  
490 Response to Inactivated Influenza Vaccine. *J Infect Dis* **212**, 861-870 (2015).
- 491 45 Roskin, K. M. *et al.* IgH sequences in common variable immune deficiency  
492 reveal altered B cell development and selection. *Science translational medicine*  
493 **7**, 302ra135 (2015).
- 494 46 Fang, F. Q. *et al.* Expression of CD39 on Activated T Cells Impairs their Survival  
495 in Older Individuals. *Cell Rep* **14**, 1218-1231 (2016).
- 496 47 He, X. S. *et al.* Plasmablast-derived polyclonal antibody response after  
497 influenza vaccination. *J Immunol Methods* **365**, 67-75 (2011).
- 498 48 Sasaki, S. *et al.* Limited efficacy of inactivated influenza vaccine in elderly  
499 individuals is associated with decreased production of vaccine-specific  
500 antibodies. *J Clin Invest* **121**, 3109-3119 (2011).
- 501 49 He, X. S. *et al.* Heterovariant Cross-Reactive B-Cell Responses Induced by the  
502 2009 Pandemic Influenza Virus A Subtype H1N1 Vaccine. *J Infect Dis* **207**, 288-  
503 296 (2013).
- 504 50 Jiang, N. *et al.* Lineage Structure of the Human Antibody Repertoire in  
505 Response to Influenza Vaccination. *Science translational medicine* **5** (2013).
- 506 51 Horowitz, A. *et al.* Genetic and environmental determinants of human NK cell  
507 diversity revealed by mass cytometry. *Science translational medicine* **5**,  
508 208ra145 (2013).
- 509 52 Cheung, P. *et al.* Single-Cell Chromatin Modification Profiling Reveals  
510 Increased Epigenetic Variations with Aging. *Cell* **173**, 1385-+ (2018).
- 511 53 Kay, A. W. *et al.* Enhanced natural killer-cell and T-cell responses to influenza  
512 A virus during pregnancy. *Proceedings of the National Academy of Sciences of*  
513 *the United States of America* **111**, 14506-14511 (2014).
- 514 54 Rubelt, F. *et al.* Individual heritable differences result in unique cell lymphocyte  
515 receptor repertoires of naive and antigen-experienced cells. *Nat Commun* **7**  
516 (2016).

- 517 55 Horns, F. *et al.* Lineage tracing of human B cells reveals the in vivo landscape  
518 of human antibody class switching. *Elife* **5** (2016).
- 519 56 de Bourcy, C. F. A., Dekker, C. L., Davis, M. M., Nicolls, M. R. & Quake, S. R.  
520 Dynamics of the human antibody repertoire after B cell depletion in systemic  
521 sclerosis. *Sci Immunol* **2** (2017).
- 522 57 O'Gorman, W. E. *et al.* The Split Virus Influenza Vaccine rapidly activates  
523 immune cells through Fc gamma receptors. *Vaccine* **32**, 5989-5997 (2014).
- 524 58 Vollmers, C., Sit, R. V., Weinstein, J. A., Dekker, C. L. & Quake, S. R. Genetic  
525 measurement of memory B-cell recall using antibody repertoire sequencing.  
526 *Proceedings of the National Academy of Sciences of the United States of*  
527 *America* **110**, 13463-13468 (2013).
- 528 59 He, X. S. *et al.* Distinct Patterns of B-Cell Activation and Priming by Natural  
529 Influenza Virus Infection Versus Inactivated Influenza Vaccination. *J Infect Dis*  
530 **211**, 1051-1059 (2015).
- 531 60 Le Gars, M. *et al.* Increased Proinflammatory Responses of Monocytes and  
532 Plasmacytoid Dendritic Cells to Influenza A Virus Infection During Pregnancy.  
533 *J Infect Dis* **214**, 1666-1671 (2016).

534

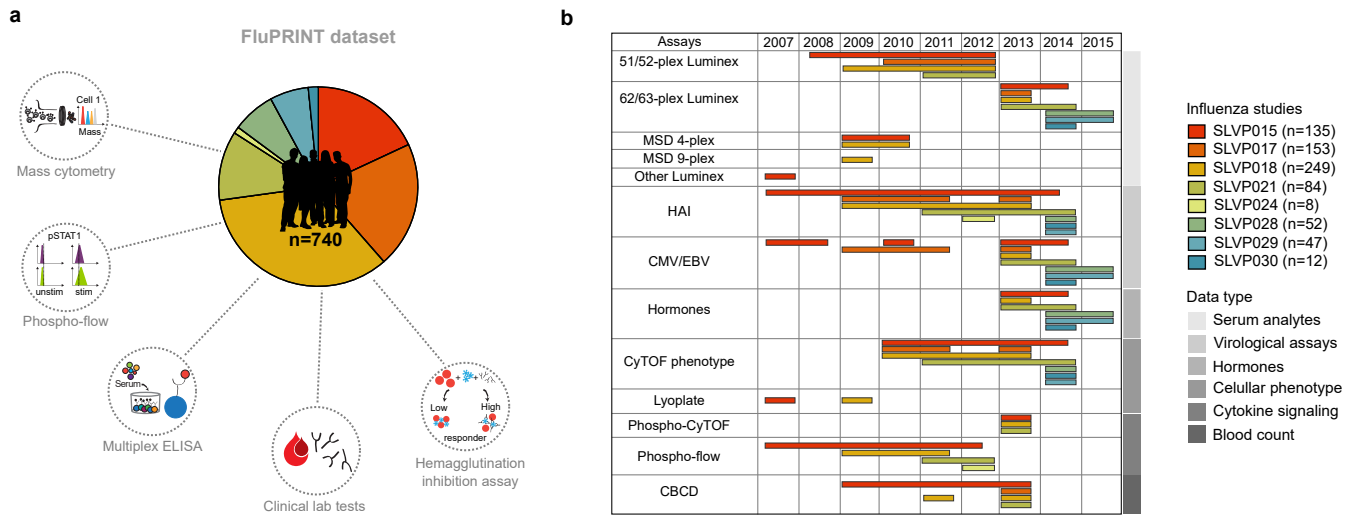

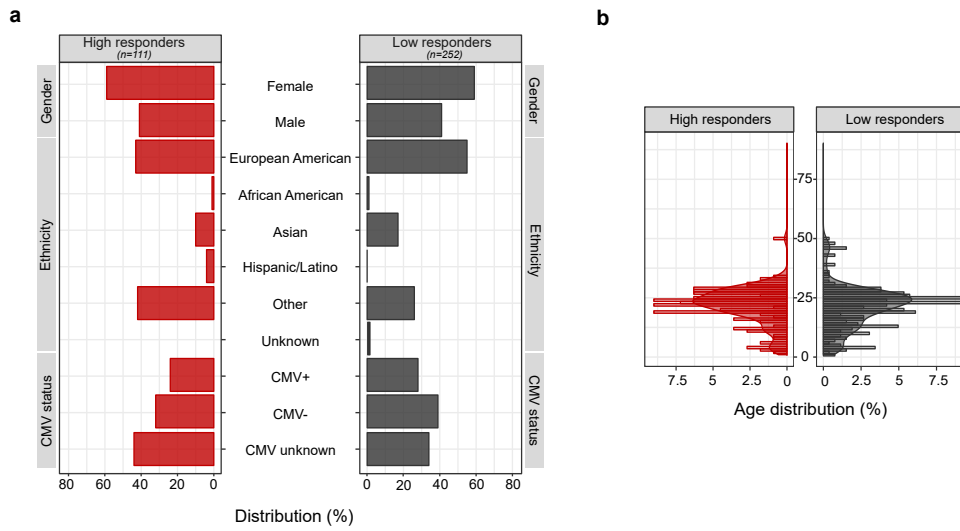

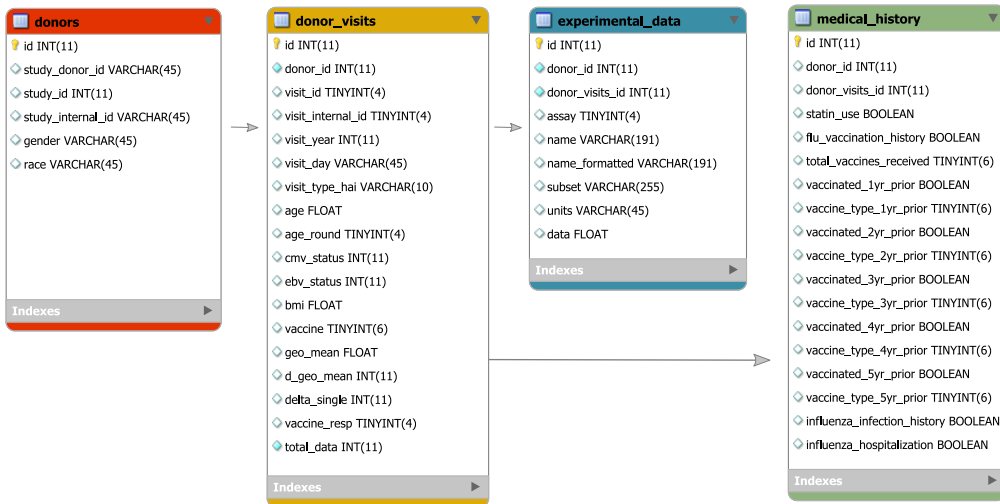

Source: http://biorxiv.org/content/10.1101/564062v2.full.pdf
